# Supplementary material
Source: PubMed Central journal article supplement (PMC8373665)
Supplement: NIHMS1704548-supplement-supinfo.pdf [file NIHMS1704548-supplement-supinfo.pdf]

## Supplement materials.

### Supplementary Table S1. List of the Selected Potentially Inappropriate Medications.

The list is based on the 2015 Beers Criteria Table 1 - Medications to avoid in adults over 65 years of age.

| Generic Medication Name        | Medication Class        |
|--------------------------------|-------------------------|
| BROMPHENIRAMINE                | Anticholinergics        |
| CARBINOXAMINE                  | Anticholinergics        |
| CHLORPHENIRAMINE               | Anticholinergics        |
| CLEMASTINE                     | Anticholinergics        |
| CYPROHEPTADINE                 | Anticholinergics        |
| DEXBROMPHENIRAMINE             | Anticholinergics        |
| DEXCHLORPHENIRAMINE            | Anticholinergics        |
| DIMENHYDRINATE                 | Anticholinergics        |
| DIPHENHYDRAMINE                | Anticholinergics        |
| DOXYLAMINE                     | Anticholinergics        |
| HYDROXYZINE                    | Anticholinergics        |
| MECLIZINE                      | Anticholinergics        |
| PROMETHAZINE                   | Anticholinergics        |
| TRIPROLIDINE                   | Anticholinergics        |
| BENZTROPINE                    | Antiparkinsonian agents |
| TRIHEXYPHENIDYL                | Antiparkinsonian agents |
| ATROPINE                       | Antispasmodics          |
| BELLADONNA ALKALOIDS           | Antispasmodics          |
| CLIDINIUM-<br>CHLORDIAZEPOXIDE | Antispasmodics          |
| DICYCLOMINE                    | Antispasmodics          |
| HYOSCYAMINE                    | Antispasmodics          |
| PROPANTHELINE                  | Antispasmodics          |
| SCOPOLAMINE                    | Antispasmodics          |
| DIPYRIDAMOLE                   | Antithrombotics         |
| TICLOPIDINE                    | Antithrombotics         |
| GUANABENZ                      | Cardiovascular          |
| GUANFACINE                     | Cardiovascular          |
| METHYLDOPA                     | Cardiovascular          |
| RESERPINE                      | Cardiovascular          |
| DISOPYRAMIDE                   | Cardiovascular          |
| NIFEDIPINE                     | Cardiovascular          |
| AMITRIPTYLINE                  | Antidepressants         |

|                                |                    |
|--------------------------------|--------------------|
| AMOXAPINE                      | Antidepressants    |
| CHLORDIAZEPOXIDE-AMITRIPTYLINE | Antidepressants    |
| CLOMIPRAMINE                   | Antidepressants    |
| DESIPRAMINE                    | Antidepressants    |
| DOXEPIN                        | Antidepressants    |
| IMIPRAMINE                     | Antidepressants    |
| NORTRIPTYLINE                  | Antidepressants    |
| PAROXETINE                     | Antidepressants    |
| PERPHENAZINE-AMITRIPTYLINE     | Antidepressants    |
| PROTRIPTYLINE                  | Antidepressants    |
| TRIMIPRAMINE                   | Antidepressants    |
| AMOBARBITAL                    | Barbiturates       |
| BUTABARBITAL                   | Barbiturates       |
| BUTALBITAL                     | Barbiturates       |
| MEPHOBARBITAL                  | Barbiturates       |
| PENTOBARBITAL                  | Barbiturates       |
| PHENOBARBITAL                  | Barbiturates       |
| SECOBARBITAL                   | Barbiturates       |
| ALPRAZOLAM                     | Benzodiazepines    |
| ESTAZOLAM                      | Benzodiazepines    |
| LORAZEPAM                      | Benzodiazepines    |
| OXAZEPAM                       | Benzodiazepines    |
| TEMAZEPAM                      | Benzodiazepines    |
| TRIAZOLAM                      | Benzodiazepines    |
| CLORAZEPATE                    | Benzodiazepines    |
| CHLORDIAZEPOXIDE               | Benzodiazepines    |
| CLONAZEPAM                     | Benzodiazepines    |
| DIAZEPAM                       | Benzodiazepines    |
| FLURAZEPAM                     | Benzodiazepines    |
| QUAZEPAM                       | Benzodiazepines    |
| MEPROBAMATE                    | Benzodiazepines    |
| ESZOPICLONE                    | Benzodiazepines    |
| ZOLPIDEM                       | Benzodiazepines    |
| ZALEPLON                       | Benzodiazepines    |
| ISOXSUPRINE                    | Ergoloid           |
| DESICCATED THYROID             | Endocrine          |
| MEGESTROL                      | Appetite Stimulant |
| CHLORPROPAMIDE                 | Sulfonylureas      |
| GLYBURIDE                      | Sulfonylureas      |

|                 |                              |
|-----------------|------------------------------|
| MINERAL OIL     | Gastrointestinal medications |
| MEPERIDINE      | Pain medications             |
| INDOMETHACIN    | Pain medications             |
| KETOROLAC       | Pain medications             |
| PENTAZOCINE     | Pain medications             |
| CARISOPRODOL    | Skeletal muscle relaxants    |
| CHLORZOXAZONE   | Skeletal muscle relaxants    |
| CYCLOBENZAPRINE | Skeletal muscle relaxants    |
| METAXALONE      | Skeletal muscle relaxants    |
| METHOCARBAMOL   | Skeletal muscle relaxants    |
| ORPHENADRINE    | Skeletal muscle relaxants    |

Note: Number of medications from Table 1 2015 Beers Criteria were not included as their appropriateness was dependent on clinical factors that could not be determined from Medicare claims data. *E.g.* Non-cyclooxygenase-selective NSAIDs were excluded because chronic use of these medications should be avoided, unless other alternatives are not effective and patients can take gastroprotective agents (proton-pump inhibitor or misoprostol). Gastroprotective agents are often available over-the counter, thus will not be captured in claims data, or there is no evidence regarding effectiveness of previous treatment in claims data.

**Supplementary Table S2. Prevalence of Different Classes of Potentially Inappropriate Medications (PIM) by Age Groups.**

| PIM category              | Prevalence of PIM, % |           |         |                  |
|---------------------------|----------------------|-----------|---------|------------------|
|                           | 65-74 y/o            | 75-84 y/o | 85+ y/o | p-value          |
| Any PIM                   | 39.2                 | 35.4      | 33.8    | <b>0.001</b>     |
| <b>PIM category</b>       |                      |           |         |                  |
| Anticholinergics          | 10.3                 | 9.6       | 11.1    | 0.392            |
| Antidepressants           | 7.2                  | 5.0       | 5.8     | <b>0.004</b>     |
| Antiparkinsonian agents   | 0.3                  | 0.2       | 0.4     | 0.708            |
| Antispasmodics            | 4.3                  | 4.1       | 2.9     | 0.141            |
| Antithrombotics           | 1.0                  | 1.3       | 1.4     | 0.409            |
| Barbiturates              | 0.3                  | 0.3       | 0.1     | 0.417            |
| Benzodiazepines           | 11.6                 | 9.8       | 8.8     | <b>0.015</b>     |
| Cardiovascular            | 2.5                  | 2.7       | 3.7     | 0.115            |
| Megestrol                 | 1.1                  | 1.8       | 3.9     | <b>&lt;0.001</b> |
| Pain drugs                | 3.1                  | 3.0       | 1.4     | <b>0.007</b>     |
| Skeletal muscle relaxants | 8.9                  | 4.6       | 2.1     | <b>&lt;0.001</b> |
| Sulfonylureas             | 4.1                  | 3.1       | 2.6     | <b>0.031</b>     |

Note: Values in bold are statistically significant at p = 0.05.

**Supplementary Table S3. Differences in Prescribing of Potentially Inappropriate Drug Classes by Sex and Multimorbidity patterns. Unadjusted and Adjusted Odds Ratio,<sup>1</sup> 95% Confidence Interval.**

| Drug class              | Prevalence of PIM <sup>4</sup> |      | Unadjusted OR women vs men (ref.) | Medicare-Adjusted OR women vs men (ref.) <sup>2</sup> | Fully-Adjusted OR women vs men (ref.) <sup>3</sup> |
|-------------------------|--------------------------------|------|-----------------------------------|-------------------------------------------------------|----------------------------------------------------|
|                         | Women                          | Men  |                                   |                                                       |                                                    |
| <b>Anticholinergics</b> |                                |      |                                   |                                                       |                                                    |
| CVM <sup>5</sup> only   | 6.7                            | 3.7  | <b>2.05 (1.28, 3.27)</b>          | <b>2.06 (1.30, 3.27)</b>                              | <b>2.04 (1.21, 3.43)</b>                           |
| CVM & no MHC & 1+ DD    | 10.3                           | 6.7  | <b>1.61 (1.32, 1.97)</b>          | <b>1.67 (1.36, 2.04)</b>                              | <b>1.63 (1.29, 2.04)</b>                           |
| CVM & 1+ MHC            | 13.8                           | 11.9 | <b>1.26 (1.04, 1.53)</b>          | <b>1.34 (1.11, 1.63)</b>                              | 1.24 (0.99, 1.56)                                  |
| No CVM                  | 9.1                            | 12.5 | 0.91 (0.22, 3.84)                 | 1.05 (0.24, 4.51)                                     | 3.12 (0.36, 27.12)                                 |
| <b>Antidepressants</b>  |                                |      |                                   |                                                       |                                                    |
| CVM only                | 3.1                            | 2.2  | 1.81 (0.69, 4.78)                 | 1.80 (0.68, 4.73)                                     | 1.74 (0.59, 5.14)                                  |
| CVM & no MHC & 1+ DD    | 4.8                            | 2.6  | <b>2.30 (1.55, 3.40)</b>          | <b>2.29 (1.55, 3.38)</b>                              | <b>2.07 (1.33, 3.21)</b>                           |
| CVM & 1+ MHC            | 11.3                           | 7.0  | <b>2.03 (1.53, 2.69)</b>          | <b>2.00 (1.50, 2.67)</b>                              | <b>1.93 (1.37, 2.73)</b>                           |
| No CVM                  | 7.6                            | 8.3  | 1.62 (0.24, 11.04)                | 1.57 (0.23, 10.74)                                    | 4.07 (0.40, 41.55)                                 |
| <b>Antispasmodics</b>   |                                |      |                                   |                                                       |                                                    |
| CVM only                | 1.5                            | 2.2  | 2.13 (0.94, 4.80)                 | 2.12 (0.94, 4.79)                                     | 2.10 (0.82, 5.35)                                  |
| CVM & no MHC & 1+ DD    | 4.2                            | 1.7  | <b>2.05 (1.39, 3.01)</b>          | <b>2.09 (1.42, 3.07)</b>                              | <b>2.10 (1.34, 3.29)</b>                           |
| CVM & 1+ MHC            | 5.8                            | 4.2  | 1.11 (0.82, 1.51)                 | 1.16 (0.85, 1.58)                                     | 1.03 (0.69, 1.55)                                  |
| No CVM                  | 6.1                            | 0    | 3.11 (0.48, 20.10)                | 3.34 (0.54, 20.62)                                    | 2.58 (0.37, 17.92)                                 |
| <b>Antithrombotics</b>  |                                |      |                                   |                                                       |                                                    |
| CVM only                | 1.0                            | 1.0  | 1.59 (0.35, 7.29)                 | 1.67 (0.36, 7.63)                                     | 1.58 (0.31, 8.09)                                  |
| CVM & no MHC & 1+ DD    | 0.6                            | 1.0  | 0.67 (0.32, 1.40)                 | 0.70 (0.33, 1.46)                                     | 0.56 (0.25, 1.28)                                  |
| CVM & 1+ MHC            | 1.7                            | 1.6  | 1.02 (0.56, 1.84)                 | 1.04 (0.57, 1.90)                                     | 0.77 (0.39, 1.53)                                  |
| No CVM                  | 0                              | 0    | 1.59 (0.35, 7.29)                 | 1.67 (0.36, 7.63)                                     | 1.58 (0.31, 8.09)                                  |
| <b>Benzodiazepines</b>  |                                |      |                                   |                                                       |                                                    |
| CVM only                | 5.7                            | 4.9  | 0.95 (0.54, 1.65)                 | 0.96 (0.55, 1.69)                                     | 1.19 (0.61, 2.30)                                  |
| CVM & no MHC & 1+ DD    | 8.3                            | 6.9  | 1.16 (0.93, 1.45)                 | 1.19 (0.95, 1.49)                                     | 1.22 (0.94, 1.57)                                  |
| CVM & 1+ MHC            | 14.7                           | 17.2 | 1.07 (0.90, 1.28)                 | 1.10 (0.92, 1.31)                                     | 1.23 (0.99, 1.54)                                  |
| No CVM                  | 7.6                            | 12.5 | 0.69 (0.17, 2.77)                 | 0.71 (0.17, 2.91)                                     | 0.52 (0.12, 2.26)                                  |
| <b>Cardiovascular</b>   |                                |      |                                   |                                                       |                                                    |
| CVM only                | 1.8                            | 1.5  | 0.60 (0.20, 1.82)                 | 0.60 (0.20, 1.82)                                     | 0.48 (0.14, 1.59)                                  |
| CVM & no MHC & 1+ DD    | 3.2                            | 2.4  | <b>1.79 (1.10, 2.92)</b>          | <b>1.81 (1.11, 2.95)</b>                              | <b>1.53 (0.88, 2.66)</b>                           |
| CVM & 1+ MHC            | 3.0                            | 3.1  | 1.23 (0.76, 1.98)                 | 1.22 (0.76, 1.96)                                     | 1.02 (0.61, 1.72)                                  |
| No CVM                  | 0                              | 0    | 0.60 (0.20, 1.82)                 | 0.60 (0.20, 1.82)                                     | 0.48 (0.14, 1.59)                                  |

|                                  |     |     |                          |                          |                          |
|----------------------------------|-----|-----|--------------------------|--------------------------|--------------------------|
| <b>Megestrol</b>                 |     |     |                          |                          |                          |
| CVM only                         | 0.3 | 0   | 3.05 (0.36, 25.71)       | 3.18 (0.38, 26.73)       | 1.40 (0.19, 10.44)       |
| CVM & no MHC & 1+ DD             | 0.5 | 1.6 | 0.71 (0.44, 1.14)        | 0.79 (0.49, 1.28)        | 0.68 (0.39, 1.18)        |
| CVM & 1+ MHC                     | 3.2 | 3.6 | 0.86 (0.65, 1.14)        | 1.02 (0.77, 1.36)        | 1.00 (0.64, 1.57)        |
| No CVM                           | 1.5 | 4.2 | 0.05 (0.00, 0.51)        | 0.06 (0.01, 0.67)        | 0.10 (0.01, 1.30)        |
| <b>Pain drugs</b>                |     |     |                          |                          |                          |
| CVM only                         | 1.8 | 2.7 | 0.70 (0.34, 1.42)        | 0.69 (0.34, 1.41)        | 0.64 (0.29, 1.42)        |
| CVM & no MHC & 1+ DD             | 2.9 | 4.0 | <b>0.53 (0.41, 0.69)</b> | <b>0.53 (0.41, 0.68)</b> | <b>0.53 (0.39, 0.72)</b> |
| CVM & 1+ MHC                     | 2.3 | 2.9 | 0.81 (0.58, 1.14)        | 0.83 (0.59, 1.17)        | 0.88 (0.59, 1.32)        |
| No CVM                           | 0   | 0   | 0.70 (0.34, 1.42)        | 0.69 (0.34, 1.41)        | 0.64 (0.29, 1.42)        |
| <b>Skeletal muscle relaxants</b> |     |     |                          |                          |                          |
| CVM only                         | 5.4 | 5.6 | 1.17 (0.69, 2.00)        | 1.18 (0.69, 2.01)        | 1.37 (0.75, 2.51)        |
| CVM & no MHC & 1+ DD             | 7.3 | 4.0 | <b>1.40 (1.11, 1.76)</b> | <b>1.41 (1.12, 1.77)</b> | <b>1.38 (1.06, 1.80)</b> |
| CVM & 1+ MHC                     | 8.1 | 5.1 | <b>1.70 (1.35, 2.15)</b> | <b>1.76 (1.38, 2.23)</b> | <b>1.70 (1.28, 2.25)</b> |
| No CVM                           | 1.5 | 4.2 | 2.64 (0.32, 21.68)       | 2.66 (0.32, 21.87)       | 2.65 (0.32, 21.89)       |
| <b>Sulfonylureas</b>             |     |     |                          |                          |                          |
| CVM only                         | 4.6 | 7.1 | 0.68 (0.34, 1.35)        | 0.70 (0.35, 1.40)        | 0.61 (0.27, 1.36)        |
| CVM & no MHC & 1+ DD             | 2.9 | 3.5 | 0.80 (0.53, 1.21)        | 0.82 (0.54, 1.23)        | 0.64 (0.41, 1.01)        |
| CVM & 1+ MHC                     | 3.2 | 4.0 | 0.74 (0.50, 1.10)        | 0.71 (0.47, 1.06)        | 0.50 (0.30, 0.84)        |
| No CVM                           | 0   | 0   | 0.68 (0.34, 1.35)        | 0.70 (0.35, 1.40)        | 0.61 (0.27, 1.36)        |

Note: Drug types with >1% prevalence of use were considered for these analyses.

<sup>1</sup>The logistic regression models with interaction term were conducted for each potentially inappropriate medication class separately.

Models were adjusted for:

<sup>2</sup> Adjusted for number of medications used  $\geq 90$  days, number of all-cause ED visits, number of all-cause hospitalizations, number of physician visits and count of chronic disease.

<sup>3</sup> Further adjusted for age group, years of education, race/ethnicity, marital status, region, BMI, current smoking status, and current alcohol use

Values in bold are statistically significant at  $p = 0.05$

<sup>4</sup> PIM-potentially inappropriate medication.

<sup>5</sup> CVM only – concordant cardiovascular-metabolic only pattern; CVM & no MHC & 1+ DD – cardiovascular-metabolic plus discordant physical conditions pattern; CVM & 1+ MHC- DD – cardiovascular-metabolic plus mental health conditions pattern; No CVM – no cardiovascular-metabolic patterns.
